# Supplementary material for: The fibronectin-binding motif within FlpA facilitates Campylobacter jejuni adherence to host cell and activation of host cell signaling
Source: PubMed Central journal article supplement — Emerg Microbes Infect. 2013 Oct 9;2(10):e65–. doi: 10.1038/emi.2013.65 (PMC3826066; doi:10.1038/emi.2013.65), 2013-10-09
Supplement: emi201365x4.pdf [file emi201365x4.pdf]

A.

|              |                                                                 |    |
|--------------|-----------------------------------------------------------------|----|
| FlpA 135-224 | RLEAVP-FVQAVTNLPNRIKLIWR-PHPDFRVDSYIIERTKGDDKEFKKIAEVKNRLNAE    | 58 |
| FN3-1        | SSGPVEVFITETPSQPNSHPIQWNAQPSH-ISKYILRWRPKNSVGRWKEATIPGHLN-S     | 58 |
|              | . * * : . . . * * : * . * : * . . . * * : . : . * * : . : * * . |    |
| FlpA 135-224 | YIDSDLKPNENSSYRIIAVSFNGIKSGSSQVVSS                              | 92 |
| FN3-1        | YTIKGLKPGVVYEGQLISIQQYGHQ-----                                  | 83 |
|              | * . . * * . . : * : * . * : *                                   |    |

B.

| Campylobacter species                      | Percent homology with FlpA (cj1279c) |
|--------------------------------------------|--------------------------------------|
| Campylobacter jejuni subsp. jejuni CG8486  | 99.51%                               |
| Campylobacter jejuni subsp. jejuni CG8421  | 99.51%                               |
| Campylobacter jejuni subsp. jejuni 81116   | 99.02%                               |
| Campylobacter jejuni RM1221                | 98.29%                               |
| Campylobacter jejuni subsp. jejuni 260.94  | 99.26%                               |
| Campylobacter jejuni subsp. jejuni 81-176  | 98.29%                               |
| Campylobacter jejuni subsp. jejuni 84-25   | 99.50%                               |
| Campylobacter jejuni subsp. jejuni HB93-13 | 99.00%                               |
| Campylobacter jejuni subsp. jejuni CF93-6  | 99.75%                               |
| Campylobacter jejuni subsp. doylei 269.97  | 94.63%                               |
| Campylobacter coli RM2228                  | 78.05%                               |
| Campylobacter upsaliensis RM3195           | 71.22%                               |
| Campylobacter lari RM2100                  | 56.16%                               |
| Campylobacter fetus subsp. fetus 82-40     | 45.16%                               |
| Campylobacter hominis ATCC BAA-381         | 42.21%                               |



|           |        |                 |
|-----------|--------|-----------------|
| C. jejuni | 81116  | LRSEPS-SKVKAAQ  |
| C. jejuni | 81-176 | LRSEPS-SKVKAAQ  |
| C. jejuni | 11168  | LRSEPS-SKVKAAQ  |
| C. doylei | 269.97 | LRSKPS-SKVKAAQ  |
| C. fetus  | 82-40  | INSNESKQAIIVVAK |
|           |        | :.*: * . : .*:  |

**Figure S3.** FlpA is a highly conserved lipoprotein with three domains homologous to FNIII repeats of Fn.

A. ClustalW alignment of FlpA-D2 (aa135-224) and 1FNIII amino acid sequences. The amino acid sequence of FlpA-D2 (aa135-224) was compared to the sequences of the 15 type three repeat domains of Fn (1-15FNIII). FlpA-D2 was most similar with 1FNIII, sharing 22.9% sequence identity with 15.7% conserved substitutions and 21.7% semi-conserved substitutions.

B. Percent homology of FlpA amino acids amongst Campylobacter species calculated using Microbes Online (<http://www.microbesonline.org>).

C. ClustalW alignment of FlpA amino acid sequences from divergent members of the Campylobacter genus. The FlpA FBLM is highlighted in bold letters.
